# Supplementary material for: Granulopoiesis Requires Increased C/EBPα Compared to Monopoiesis, Correlated with Elevated Cebpa in Immature G-CSF Receptor versus M-CSF Receptor Expressing Cells
Source: PubMed Central journal article supplement (PMC3994156; doi:10.1371/journal.pone.0095784), 2014-04-21
Supplement: pone.0095784.s006.pdf [file pone.0095784.s006.pdf]

**TABLE S2. Fold-change (FC) of indicated RNAs by *Cebpa* B9 shRNA vs vector in lineage-negative marrow cells**

| SYMBOL    | FC Exp 1 | FC Exp 2 | SYMBOL  | FC Exp 1 | FC Exp 2 | SYMBOL    | FC Exp 1  | FC Exp 2  |
|-----------|----------|----------|---------|----------|----------|-----------|-----------|-----------|
| Aatk      | -2.78606 | -2.1959  | Bcl11a  | 1.773192 | 1.668057 | Ctsb      | -1.610444 | -1.624736 |
| Abcb4     | 3.473837 | 2.83297  | Blvrb   | 1.856152 | 1.892175 | Ctsg      | -1.942708 | -1.698496 |
| Abcd1     | -1.58644 | -1.78119 | Bzrap1  | -2.47846 | -2.27463 | Ctsh      | -1.923585 | -1.790923 |
| Abcd2     | -1.69447 | -1.59032 | C3      | -3.36181 | -3.57088 | Cxcr4     | -1.717749 | -1.58807  |
| Abhd5     | -2.6176  | -2.10194 | Camp    | -7.71809 | -8.27151 | Cyba      | -1.450878 | -1.463026 |
| Abi3      | 2.313458 | 2.088759 | Capn5   | 2.223086 | 2.36851  | D3Ucla1   | -1.526507 | -1.430294 |
| Acadsb    | -1.67383 | -1.60237 | Car1    | 1.589696 | 1.593206 | Dcakd     | 1.737637  | 1.569008  |
| Acot1     | -2.11445 | -2.24388 | Car12   | 1.848505 | 1.635572 | Ddit4     | 1.902778  | 1.682345  |
| Acpl2     | -2.13806 | -1.96787 | Car13   | 1.419987 | 1.618723 | Dgat2     | -7.612098 | -4.988847 |
| Acpp      | -1.87856 | -1.46731 | Car2    | 4.364771 | 4.190226 | Dgkg      | -1.956478 | -1.969725 |
| Acs1      | -1.74634 | -1.73664 | Cas2    | -2.63495 | -2.18761 | Dhrs7     | -1.61073  | -1.578228 |
| Acss1     | 2.444768 | 2.429952 | Cas3    | -1.48326 | -1.89977 | Dhrs7b    | 1.503774  | 1.465265  |
| Actn1     | -1.86674 | -1.76072 | Ccl6    | -7.1412  | -3.19703 | Dmkn      | -3.428072 | -2.997608 |
| Adfp      | -1.49775 | -1.84183 | Ccnd1   | 4.985514 | 3.633958 | Dnajc6    | 1.615083  | 1.443701  |
| Adssl1    | -2.00096 | -1.88669 | Ccno    | -3.0429  | -2.4109  | Dnmt3b    | 2.467118  | 2.042879  |
| Aff1      | -1.51449 | -1.4831  | Cd177   | -2.18462 | -1.80093 | Dnmt3l    | -2.840231 | -2.391078 |
| Agpat2    | -1.79333 | -1.41865 | Cd27    | 1.551881 | 1.446977 | Dok2      | 1.54764   | 2.293956  |
| Agps      | -3.49333 | -2.97619 | Cd34    | 1.758961 | 1.670466 | Dok3      | -2.412002 | -2.045307 |
| Agtrap    | -1.53495 | -1.62834 | Cd52    | 4.140935 | 2.67311  | Dolpp1    | -1.661132 | -1.542562 |
| Akr1c18   | -6.83423 | -2.86504 | Cd59a   | 2.003008 | 2.842894 | Dpp4      | 2.591039  | 2.437946  |
| Alad      | 2.030576 | 2.069589 | Cd72    | 1.661972 | 1.695804 | Drctnb1a  | 1.426041  | 1.59152   |
| Alas1     | -2.58051 | -1.94711 | Cd74    | 1.664893 | 2.076412 | Dstn      | -3.477062 | -2.687704 |
| Aldh3b1   | -1.66829 | -1.65585 | Cd93    | -2.01649 | -2.20717 | Dtx4      | -1.954056 | -1.591283 |
| Aldh4a1   | -1.88349 | -1.83244 | Cd96    | 1.45     | 1.412989 | Dusp1     | 1.828865  | 1.549144  |
| Als2      | 1.921425 | 2.194735 | Cda     | 2.572719 | 2.108132 | Dusp16    | 1.641319  | 1.456615  |
| Angpt1    | 1.498685 | 1.862396 | Cdkn1a  | 1.612732 | 1.635055 | Dyrk3     | 1.488968  | 1.569273  |
| Ank       | 1.560758 | 1.544044 | Ceacam1 | -1.81092 | -1.41611 | Ear2      | -3.132222 | -2.543087 |
| Ankrd28   | -1.74319 | -1.59567 | Ceacam2 | -1.81679 | -1.62636 | Ear3      | -2.228286 | -1.784173 |
| Anxa1     | -4.28826 | -2.41542 | Cebpa   | -1.87106 | -1.74783 | Ear4      | -3.929922 | -2.696113 |
| Anxa2     | -1.52583 | -1.77534 | Cebpe   | -4.40164 | -3.46027 | Ear6      | -7.791869 | -3.110962 |
| Anxa3     | -4.521   | -3.04478 | Celsr3  | -1.92403 | -1.54056 | Egfl7     | 1.612459  | 1.997446  |
| App       | -2.17113 | -1.91233 | Chchd10 | -2.0676  | -1.78575 | Ela1      | 1.408222  | 1.509103  |
| Aqp1      | 4.358209 | 3.558584 | Chd7    | -1.78746 | -2.05863 | Ela2      | -9.972096 | -5.61423  |
| Aqp9      | 1.461252 | 1.975941 | Chi3l1  | -2.38816 | -1.49906 | Epb4.1l4b | 1.729266  | 1.655452  |
| Arhgef6   | -1.57862 | -1.53535 | Chi3l3  | -8.47139 | -12.439  | Epdr1     | 1.984454  | 2.230618  |
| Arid3a    | -2.44681 | -1.91178 | Chi3l4  | -8.18977 | -9.78813 | Epx       | -3.153058 | -2.484468 |
| Arl11     | -3.33969 | -2.42249 | Chordc1 | -2.76831 | -2.10173 | Eraf      | 3.707257  | 2.654888  |
| Arsb      | -2.72417 | -2.21665 | Chpt1   | -2.11615 | -1.91684 | Ethe1     | -1.952841 | -1.55654  |
| Art4      | 1.607731 | 1.630191 | Chst12  | -1.95853 | -1.74717 | Ets1      | -2.952715 | -1.800166 |
| Atf5      | -1.778   | -1.99815 | Chst13  | -3.16766 | -2.12042 | F10       | -3.340401 | -2.62533  |
| Atg12     | -2.64751 | -2.02606 | Cldn15  | -3.28275 | -3.07503 | F13a1     | -2.877161 | -4.742674 |
| Atp13a2   | 1.516652 | 1.612843 | Clec5a  | -1.56804 | -1.97578 | F2r       | 1.791904  | 3.119444  |
| Atp1b2    | 1.539749 | 1.429817 | Cnih4   | -1.51656 | -1.56156 | F2rl3     | 1.48705   | 1.533169  |
| Atp6ap2   | -1.72285 | -1.59333 | Cnn2    | -1.73542 | -1.4594  | Fam102a   | 2.100278  | 2.353105  |
| Atp6v0b   | -1.62729 | -1.45691 | Col18a1 | 1.955182 | 2.210647 | Fam129b   | 2.652116  | 1.892715  |
| Atp8b4    | -1.55338 | -1.75678 | Creld2  | -2.53173 | -1.74642 | Fam160a2  | -2.883949 | -2.184552 |
| B3gnt8    | -1.8534  | -1.94335 | Cryl1   | 1.658901 | 1.503988 | Fbxo21    | 1.40877   | 1.409892  |
| B4galt6   | -4.71611 | -3.23629 | Csf2ra  | -1.45455 | -1.6888  | Fcgr2b    | -1.98491  | -1.625026 |
| Bace1     | -1.49544 | -1.57676 | Csf3r   | -1.5004  | -1.58565 | Fcgr3     | -3.208237 | -2.242771 |
| Bak1      | -1.62706 | -1.63885 | Csnk1e  | 1.760719 | 1.772779 | Fcgr4     | -1.596765 | -1.460989 |
| Bambi-ps1 | -2.59901 | -1.75621 | Cstb    | -2.12218 | -1.73885 | Fcnb      | -5.426349 | -4.052279 |
| Bat5      | 1.463544 | 1.406789 | Ctdspl  | -2.00622 | -1.66687 | Fgd4      | -1.626046 | -1.453322 |
| Bcas1     | -1.61913 | -1.45384 | Ctla2b  | 1.631841 | 1.94024  | Fkbp11    | -2.540422 | -1.748762 |

| SYMBOL  | FC Exp 1 | FC Exp 2 |  | SYMBOL   | FC Exp 1 | FC Exp 2 |  | SYMBOL  | FC Exp 1  | FC Exp 2  |
|---------|----------|----------|--|----------|----------|----------|--|---------|-----------|-----------|
| Flot2   | -2.77876 | -2.44469 |  | Ier3     | 2.036012 | 1.755508 |  | Mogat2  | -2.190726 | -1.82568  |
| Fmn12   | -1.50309 | -1.45437 |  | Ifi47    | 1.403711 | 1.940877 |  | Mpo     | -2.23701  | -1.818724 |
| Fndc3b  | -1.67803 | -1.7823  |  | Ifitm3   | 1.739295 | 1.473669 |  | Mpp1    | -2.394564 | -1.613908 |
| Frat2   | -1.59222 | -1.68036 |  | Ifngr1   | -1.82287 | -1.92529 |  | Mreg    | -3.204831 | -2.520615 |
| Fut4    | -1.48269 | -1.50428 |  | Ikbke    | -1.74547 | -1.46804 |  | Mrps26  | -1.759823 | -1.574981 |
| G0s2    | -2.3362  | -2.17605 |  | Il1b     | 1.411448 | 1.906918 |  | Ms4a3   | -2.984152 | -2.199459 |
| G6pdx   | -1.43378 | -1.48318 |  | Imap38   | 1.501224 | 1.664406 |  | Mta3    | 1.946294  | 2.054077  |
| Gadd45a | -1.90758 | -1.84293 |  | Ipo4     | 1.61443  | 1.546884 |  | Mtap    | -2.57909  | -1.986525 |
| Gapt    | -3.7969  | -2.88921 |  | Irak3    | -1.89398 | -1.51178 |  | Mtf1    | -1.567849 | -1.497649 |
| Gca     | -2.72821 | -2.38961 |  | Irf2     | 1.511095 | 1.458961 |  | Mtus1   | -1.811791 | -1.964861 |
| Gcnt2   | 1.435876 | 1.487617 |  | Irf9     | 1.595868 | 1.628871 |  | Muc13   | 1.730139  | 1.420766  |
| Gda     | -1.47577 | -1.4087  |  | Itgb2l   | -1.57054 | -1.56654 |  | Myl4    | 1.673523  | 1.866586  |
| Gfi1    | -4.95707 | -3.65471 |  | Itpripl2 | -1.41541 | -1.50632 |  | Mylc2pl | -2.814303 | -2.470598 |
| Gfi1b   | 3.697187 | 3.558674 |  | Kcnab2   | -1.49196 | -1.47809 |  | Myo1f   | -1.681348 | -1.759078 |
| Gga2    | -2.42195 | -1.76988 |  | Kcnn4    | 1.868408 | 1.745331 |  | Naip2   | -1.430607 | -1.678168 |
| Gimap1  | 2.608771 | 3.499111 |  | Klf1     | 2.618367 | 2.342917 |  | Nalp6   | 3.311192  | 3.411313  |
| Gimap6  | 1.453445 | 1.773497 |  | Lat2     | 1.40766  | 2.020919 |  | Narf    | 1.518424  | 1.428734  |
| Gimap9  | 1.575174 | 1.483636 |  | Lbp      | -2.62437 | -2.91596 |  | Necap2  | 1.546315  | 1.445479  |
| Gjb3    | -1.78133 | -1.7933  |  | Lcn2     | -4.12649 | -5.99512 |  | Nedd9   | -1.753119 | -1.685875 |
| Glrx    | -1.66848 | -1.6454  |  | Lgals3   | -5.27795 | -3.93985 |  | Neu1    | -1.71897  | -1.790033 |
| Glrx1   | -1.55063 | -1.64828 |  | Lgals3bp | 2.537506 | 2.323946 |  | Nfe2l2  | -1.549458 | -1.412781 |
| Gmpr    | 2.019369 | 2.246991 |  | Lgals9   | 1.61514  | 1.874464 |  | Nfkb1a  | 1.427779  | 1.505694  |
| Gna14   | 1.5199   | 1.527914 |  | Lincr    | 1.4858   | 1.593681 |  | Ng23    | 2.54024   | 2.516209  |
| Golm1   | 2.343428 | 2.088784 |  | Lmf1     | -1.4381  | -1.4424  |  | Ngp     | -15.67212 | -22.59197 |
| Gpc1    | -2.13735 | -2.38823 |  | Lmna     | 2.678271 | 2.762077 |  | Nin     | -2.035007 | -1.86016  |
| Gpi1    | -1.46067 | -1.42143 |  | Lpl      | 1.436709 | -1.43671 |  | Nipa1   | 1.531404  | 1.543454  |
| Gpr128  | 1.662515 | 1.502521 |  | Lpxn     | 2.146779 | 1.978042 |  | Nkg7    | -1.796487 | -1.897756 |
| Gpr160  | -2.90839 | -2.14402 |  | Lrg1     | -2.93872 | -2.61374 |  | Nod1    | -1.669549 | -1.886353 |
| Gpr177  | -2.04607 | -1.57851 |  | Lrp12    | 1.796386 | 1.627343 |  | Nras    | -2.32673  | -1.81336  |
| Gpr84   | -1.6081  | -1.67436 |  | Lrrc8d   | -1.4768  | -1.44875 |  | Nrp1    | -2.388553 | -1.501567 |
| Gpx3    | -1.77071 | -1.9202  |  | Ltb      | 1.772461 | 1.782787 |  | Nt5dc2  | -1.500683 | -1.408352 |
| Grcc10  | 1.704474 | 1.640522 |  | Ltb4r1   | -4.19765 | -3.2416  |  | Nuak2   | -1.690133 | -1.479658 |
| Gria3   | -1.50316 | -1.60159 |  | Ltc4s    | 1.577017 | 1.454623 |  | Nudt7   | 1.427564  | 1.800152  |
| Gstm1   | -5.12172 | -3.8106  |  | Ltf      | -3.12841 | -1.96164 |  | Olfml2b | -2.251902 | -1.908305 |
| Gyg     | -1.65856 | -1.58297 |  | Ly6a     | 4.467999 | 4.043531 |  | Ormdl3  | 1.672383  | 2.02604   |
| Gypa    | 1.765562 | 1.676686 |  | Ly6c1    | -7.65394 | -6.29582 |  | Osbpl3  | -1.573529 | -1.486243 |
| H2-Q8   | 1.593446 | 2.179857 |  | Ly6e     | 1.560928 | 1.536854 |  | Ostm1   | -1.575304 | -1.409141 |
| H47     | -1.5102  | -1.41387 |  | Lyrm5    | -1.67927 | -1.51314 |  | P2ry1   | -1.569405 | 1.531944  |
| Hba-a1  | 21.8606  | 15.99266 |  | Lyz      | -1.46101 | -1.958   |  | P4hb    | -1.498463 | -1.413801 |
| Hbb-b1  | 5.250435 | 5.371228 |  | M6prbp1  | -2.1034  | -1.83471 |  | Pabpc4  | -1.566113 | -1.515253 |
| Hdc     | -3.48577 | -1.71637 |  | Map3k11  | -1.8685  | -1.73819 |  | Pacs1   | 1.409157  | 1.583395  |
| Hdlbp   | -1.75798 | -1.57863 |  | Map3k3   | -1.84457 | -1.60401 |  | Pacs2   | 1.750809  | 1.433943  |
| Heatr5a | 1.509398 | 1.538639 |  | Map3k6   | 1.683646 | 1.587019 |  | Palm    | -1.659871 | -1.568807 |
| Hebp1   | 1.779929 | 1.574527 |  | Mapkap3  | -1.44782 | -1.44857 |  | Papss2  | -2.349016 | -1.681653 |
| Hectd1  | 1.49349  | 1.572807 |  | Mcee     | -1.9867  | -1.80684 |  | Pcyt1b  | 1.623964  | 2.043536  |
| Hemgn   | 2.671083 | 2.343039 |  | Mcf2     | -1.85879 | -1.57051 |  | Pdia4   | -1.837615 | -1.524305 |
| Hgf     | -2.48642 | -1.55697 |  | Mcpt8    | -4.5473  | -2.37907 |  | Pdlim1  | -2.201746 | -1.73681  |
| Hgfac   | 2.275188 | 2.052899 |  | Med21    | -2.14657 | -1.60888 |  | Pfkfb4  | -2.551391 | -2.079286 |
| Hmgn3   | -6.5172  | -2.0527  |  | Meis1    | 1.687968 | 1.74102  |  | Pgd     | -1.700537 | -1.638297 |
| Hp      | -2.90315 | -4.08923 |  | Mettl9   | -1.96191 | -1.93159 |  | Pglyrp1 | -4.21329  | -4.168944 |
| Hs6st1  | 1.491117 | 1.478051 |  | Mfge8    | 2.052709 | 2.0615   |  | Phc1    | 1.510388  | 1.520448  |
| Hsd11b1 | -4.81155 | -4.68056 |  | Mgat4b   | 1.45433  | 1.418801 |  | Phlda1  | 1.470159  | 1.708334  |
| Hsd17b1 | -2.53137 | -2.28518 |  | Mgst1    | -3.73642 | -3.25582 |  | Phlda2  | 3.838898  | 3.049587  |
| Hvcn1   | -3.24043 | -3.10477 |  | Mgst2    | -3.00975 | -3.02405 |  | Pik3ap1 | -1.499485 | -2.00227  |
| Idh1    | -1.70979 | -1.78512 |  | Mist1    | -1.53219 | -1.50599 |  | Pip4k2a | 1.90561   | 1.598422  |

| SYMBOL   | FC Exp 1 | FC Exp 2 |  | SYMBOL    | FC Exp 1 | FC Exp 2 |  | SYMBOL          | FC Exp 1  | FC Exp 2  |
|----------|----------|----------|--|-----------|----------|----------|--|-----------------|-----------|-----------|
| Pld1     | -1.89286 | -1.55805 |  | Sepx1     | -2.75381 | -2.26428 |  | Thbs1           | -2.891735 | -1.98036  |
| Plek     | 2.045833 | 2.177696 |  | Serpina3f | 2.389708 | 2.865986 |  | Tlr4            | -1.474755 | -1.561682 |
| Plod3    | -2.03322 | -1.77076 |  | Serpina3g | 1.40255  | 2.204494 |  | Tm6sf1          | -1.562121 | -1.636923 |
| Plscr1   | 2.70499  | 2.93983  |  | Serpina3i | -2.04432 | -1.49638 |  | Tmc7            | -1.557761 | -1.442654 |
| Plxnd1   | -2.03559 | -1.85137 |  | Serpine2  | -1.83545 | 1.779317 |  | Tmed3           | -2.787634 | -1.85337  |
| Podxl    | 1.463403 | 2.180858 |  | Serpinf1  | 2.024174 | 1.441073 |  | Tmem109         | 2.296614  | 1.498087  |
| Ppapdc1  | -2.21944 | -1.89435 |  | Sesn1     | 1.485896 | 1.692223 |  | Tmem176b        | 2.320219  | 2.295245  |
| Ppapdc1b | -2.74967 | -1.89118 |  | Sgk1      | -2.42316 | -1.62613 |  | Tmem180         | -1.471889 | -1.431241 |
| Ppic     | -2.62513 | -1.82232 |  | Sgms2     | -2.05104 | -1.82392 |  | Tmem23          | 1.477374  | 1.722192  |
| Ppif     | 1.616629 | 1.674081 |  | Sgpp1     | -2.01643 | -1.89601 |  | Tmem38b         | -2.155247 | -2.101419 |
| Ppm1m    | -1.58393 | -1.55871 |  | Sh3kbp1   | -1.61469 | -1.47057 |  | Tmem39a         | -1.684802 | -1.596977 |
| Ppp1r13b | 1.487214 | 1.462436 |  | Sh3tc1    | -1.61727 | -1.50402 |  | Tmem50b         | -2.343654 | -2.163105 |
| Pqlc3    | -1.64098 | -1.46565 |  | Sipa1l1   | 1.467854 | 1.510809 |  | Tmem53          | -1.495552 | -1.537587 |
| Prdx4    | 3.367898 | 2.476497 |  | Sirpa     | -1.79838 | -1.98618 |  | Tnf             | 1.58887   | 1.596023  |
| Prdx5    | -1.92734 | -1.54469 |  | Sl2       | 3.148479 | 2.665422 |  | Tnfrsf21        | -1.72088  | -1.407482 |
| Prg2     | -4.29357 | -3.62427 |  | Slc14a1   | 1.617921 | 3.202525 |  | Tnfrsf26        | -1.73743  | -1.567689 |
| Prg3     | -3.25    | -2.10024 |  | Slc16a6   | -1.44561 | -1.60121 |  | Tnfsf12-tnfsf13 | -2.3433   | -2.553554 |
| Prkcb    | -1.90047 | -1.64971 |  | Slc22a4   | -1.68644 | -1.52681 |  | Tnik            | 1.435897  | 1.586572  |
| Prnp     | 1.78447  | 2.439533 |  | Slc24a3   | 1.551007 | 2.176899 |  | Tpcn1           | -1.529356 | -1.518984 |
| Prom     | -1.51957 | -1.40177 |  | Slc24a6   | -3.22413 | -2.58346 |  | Tpst1           | 1.581051  | 1.400079  |
| Prss34   | -47.6318 | -19.3186 |  | Slc28a2   | -1.56539 | -1.46948 |  | Trem3           | -3.812979 | -3.41592  |
| Prssl1   | -2.23434 | -1.90099 |  | Slc2a6    | 1.857682 | 1.530962 |  | Trim11          | -1.401282 | -1.427149 |
| Prtn3    | -2.69641 | -2.2273  |  | Slc38a5   | 3.479519 | 2.321033 |  | Trim45          | -1.450249 | -1.443764 |
| Ptp4a3   | 1.548473 | 1.651938 |  | Slc39a4   | 1.613323 | 1.703302 |  | Trip6           | 1.404133  | 1.555556  |
| Pygl     | -2.26853 | -1.92489 |  | Slc40a1   | -3.5145  | -3.39848 |  | Trove2          | 1.417271  | 1.568256  |
| Rab27a   | -2.62647 | -2.09448 |  | Slc43a1   | 1.560904 | 1.532378 |  | Tsc22d1         | 1.562874  | 1.517373  |
| Rab31    | -1.54251 | -1.44144 |  | Slc45a3   | 1.804612 | 2.268173 |  | Tspan33         | 1.797449  | 1.982536  |
| Rab32    | -1.8322  | -1.97057 |  | Slpi      | -5.9626  | -3.09279 |  | Tubb6           | -1.414219 | -1.699348 |
| Rab3d    | -2.20818 | -1.95564 |  | Smap2     | 2.205949 | 1.977287 |  | Txndc13         | -6.476911 | -4.086424 |
| Ralb     | -1.90165 | -1.64858 |  | Smpdl3a   | -1.59453 | -1.70257 |  | Uap1            | -1.559767 | -1.492497 |
| Rasa2    | -1.50894 | -1.49711 |  | Snai3     | -1.99206 | -1.80389 |  | Ube1l           | 1.465237  | 2.28104   |
| Rasgrp2  | -1.80122 | -1.51147 |  | Snap23    | 1.606787 | 1.627971 |  | Unc84b          | -2.751178 | -2.092582 |
| Rbms1    | -1.60323 | -1.60041 |  | Snx18     | -1.5043  | -1.66577 |  | Usp18           | 2.611264  | 3.234808  |
| Rbpms    | 1.412564 | 1.529259 |  | Sort1     | -2.82485 | -3.33019 |  | Vamp5           | 1.891608  | 2.178572  |
| Rfesd    | 1.428335 | 1.480512 |  | Sort1     | -3.32373 | -2.41021 |  | Vamp8           | 1.403484  | 1.527022  |
| Rftn1    | 1.428962 | 1.506347 |  | Sox4      | 1.662055 | 1.455767 |  | Vat1            | -4.256589 | -2.361801 |
| Rgs1     | 1.793987 | 1.950537 |  | Spp1      | -1.77812 | -2.50861 |  | Vcam1           | -1.494981 | -1.511753 |
| Rhob     | -1.53661 | -1.64231 |  | Spred1    | 2.03734  | 1.511286 |  | Vezf1           | 1.473708  | 1.651634  |
| Rhou     | -2.18696 | -1.85838 |  | Srgn      | -1.95555 | -1.54861 |  | Vim             | -1.461063 | -1.406327 |
| Rnase12  | -5.29757 | -2.5519  |  | Ssbp3     | 1.530606 | 1.472962 |  | Xbp1            | -2.186884 | -1.815985 |
| Rnd3     | -1.52403 | -1.61862 |  | St3gal5   | 1.90581  | 1.907586 |  | Xdh             | -1.513426 | -1.564627 |
| Rsad1    | 1.464359 | 1.538267 |  | St3gal6   | 1.923907 | 2.244531 |  | Xlr4a           | 1.669714  | 1.47084   |
| S100a11  | -2.19039 | -2.21917 |  | Stab1     | -1.61121 | -1.43001 |  | Xpc             | -1.659959 | -1.452587 |
| S100a8   | -2.81365 | -11.1406 |  | Stfa1     | -2.21681 | -15.316  |  | Ybx3            | 1.482511  | 1.483955  |
| S100a9   | -6.5495  | -33.0747 |  | Susd3     | 1.605244 | 1.754553 |  | Ypel3           | 1.646499  | 1.553087  |
| Samd14   | 2.158168 | 2.698607 |  | Syngn2    | -1.50185 | -1.45906 |  | Ypel5           | -2.227888 | -1.781476 |
| Scamp4   | -2.12782 | -1.90224 |  | Tal1      | 1.810074 | 2.205297 |  | Zfp3611         | 1.791717  | 1.612261  |
| Sccpdh   | -1.5725  | -1.62579 |  | Tank      | -1.44849 | -1.68964 |  |                 |           |           |
| Scin     | 2.181513 | 3.351993 |  | Tbc1d2    | -1.67622 | -1.41027 |  |                 |           |           |
| Sdcbp    | -1.76034 | -1.59498 |  | Tceb3     | -1.66339 | -1.48827 |  |                 |           |           |
| Sdf2l1   | -1.81854 | -1.47414 |  | Tcirg1    | -1.44755 | -1.48945 |  |                 |           |           |
| Sdsl     | 1.772752 | 2.133542 |  | Tcn2      | -2.29463 | -2.16339 |  |                 |           |           |
| Selplg   | -1.51957 | -1.56288 |  | Tex2      | -2.40975 | -1.97583 |  |                 |           |           |
| Sema4a   | -3.33802 | -3.02891 |  | Tex9      | 1.677935 | 1.68186  |  |                 |           |           |
| Sepr1    | -1.6219  | -1.59078 |  | Tgm2      | -1.59541 | -1.88078 |  |                 |           |           |
